# Supplementary material
Source: MDPI journal article supplement (https://www.mdpi.com/2073-4395/12/2/451)
Supplement: s1 [file s1]

**Table S1.** Standard scoring functions and indicators parameters in the study area (SSF Equations were adopted from Zeraatpisheh et al. [31]).

| Indicator                               | FT | L      | U      | O         | SSF Equation                                                                                          |                                                                                                                     |
|-----------------------------------------|----|--------|--------|-----------|-------------------------------------------------------------------------------------------------------|---------------------------------------------------------------------------------------------------------------------|
| pH                                      | OR | 7.60   | 7.80   | 7         | $S_L$                                                                                                 |                                                                                                                     |
| EC (dS m <sup>-1</sup> )                | OR | 1.09   | 1.40   | 0.20-2.00 | $= \begin{cases} 1 & x \leq L \\ 1 - 0.9 \frac{x-L}{U-L} & L < x < U \\ 0.1 & x \geq U \end{cases}$   | $\begin{matrix} & & \\ & & \\ & & \end{matrix} \begin{matrix} \\ \\ \end{matrix} \begin{matrix} \\ \\ \end{matrix}$ |
| ρb (kg m <sup>-3</sup> )                | LB | 1.04   | 1.80   | -         |                                                                                                       |                                                                                                                     |
| CCE (%)                                 | LB | 17.50  | 35.50  | -         |                                                                                                       |                                                                                                                     |
| SOM (%)                                 | MB | 1.09   | 2.35   | -         | $S_L$                                                                                                 |                                                                                                                     |
| TN (%)                                  | MB | 0.09   | 0.30   | -         | $= \begin{cases} 0.1 & x \leq L \\ 0.9 \frac{x-L}{U-L} + 0.1 & L < x < U \\ 1 & x \geq U \end{cases}$ | $\begin{matrix} & & \\ & & \\ & & \end{matrix} \begin{matrix} \\ \\ \end{matrix} \begin{matrix} \\ \\ \end{matrix}$ |
| P <sub>ava</sub> (mg kg <sup>-1</sup> ) | MB | 30.61  | 48.91  | -         |                                                                                                       |                                                                                                                     |
| K <sub>ava</sub> (mg kg <sup>-1</sup> ) | MB | 294.66 | 667.59 | -         |                                                                                                       |                                                                                                                     |

EC: electrical conductivity, ρb: bulk density, CCE: calcium carbonate equivalent, SOM: soil organic matter, TN: total nitrogen, P<sub>ava</sub>: available phosphorous, K<sub>ava</sub>: available potassium. FT: function type; LB: the lower, the better; MB: the more, the better; OR: optimal range; SSF: standard scoring function; x: indicator value, S<sub>L</sub>: linear score of indicator; L: lower threshold values; U: upper threshold values.
